1  
2  
3  
4  
5  
6  
7  
8  
9  
10  
11  
12  
13  
14  
15  
16  
17  
18  
19  
20  
21  
22  
23  
24  
25  
26  
27  
28  
29  
30  
31

**Impact of Providing Future Cardiovascular Risk Based on Genetic Testing on Low-Density Lipoprotein Cholesterol in Patients with Familial Hypercholesterolemia (GenTLe-FH): A Randomized Wait-list Controlled Open-Label Trial**

**Short title:** Impact of genetic testing on LDL-C in GenTLe-FH

Akihiro Nomura,<sup>1,2</sup> MD, PhD, Hirofumi Okada<sup>2</sup>, MD, PhD, Atsushi Nohara<sup>3</sup>, MD, PhD, Masaki Kawashiri<sup>4</sup>, MD, PhD, Masayuki Takamura<sup>2</sup>, MD, PhD, Hayato Tada<sup>2</sup>, MD, PhD

<sup>1</sup> Innovative Clinical Research Center, Kanazawa University (iCREK), Kanazawa, Japan

<sup>2</sup> Department of Cardiovascular Medicine, Kanazawa University Graduate School of Medical Sciences, Kanazawa, Japan

<sup>3</sup> Department of Clinical Genetics, Ishikawa Prefectural Central Hospital, Kanazawa, Japan

<sup>4</sup> Department of Internal Medicine, Kaga Medical Center, Kaga, Japan

**Corresponding author:**

Hayato Tada, MD, PhD

Assistant Professor

Department of Cardiovascular and Internal Medicine

Kanazawa University Graduate School of Medical Sciences

13-1 Takara-machi, Kanazawa, Ishikawa, 9208641 Japan

Phone number: +81-76-265-2254

E-mail: ht240z@sa3.so-net.ne.jp

ORCID ID: 0000-0002-3357-1809

**Word count:**

32 **Abstract**

33 **Background and Aims:** Familial hypercholesterolemia (FH) is an autosomal dominant  
34 monogenic disease characterized by high low-density lipoprotein cholesterol (LDL-C) levels.  
35 Although carrying causative FH variants is associated with coronary heart disease (CHD), it  
36 remains unclear whether disclosing its associated cardiovascular risk affects outcomes in  
37 patients with FH. Here, we evaluated the efficacy of providing future cardiovascular risk based  
38 on genetic testing in addition to a standard FH education program.

39 **Methods:** We conducted a randomized, wait-list controlled, open-label, single-center trial. In  
40 the intervention group, we reported a future cardiovascular risk based on the genetic testing  
41 adding to standard FH education at week 0. In the wait-list control group, we only disseminated  
42 standard FH education according to the guidelines at week 0; they later received a genetic  
43 testing-based cardiovascular risk assessment at week 24. The primary endpoint of this study  
44 was the plasma LDL-C level at week 24.

45 **Results:** Fifty eligible patients with clinically diagnosed FH, without a history of CHD, were  
46 allocated to the intervention group (n=24) or the wait-list control group (n=26). At week 24,  
47 the intervention group had a significantly greater reduction in LDL-C levels than the wait-list  
48 control group (mean changes, -13.1 mg/dL vs. 6.6 mg/dL; difference, -19.7 mg/dL; 95%  
49 confidence interval, -34 to -5.6; p=0.009). This interventional effect was consistent with FH  
50 causative variant carriers but not with non-carriers.

51 **Conclusions:** In addition to standard FH care, providing future cardiovascular risk based on  
52 genetic testing can further reduce plasma LDL-C levels, particularly among FH causal variant  
53 carriers.

54

55 **Registration:** Japan Registry of Clinical Trials (jRCTs04218002).

56 URL: <https://jrct.niph.go.jp/latest-detail/jRCTs042180027>

57

58 **Key words:** familial hypercholesterolemia, genetic risk disclosure, genomics, coronary disease,  
59 randomized clinical trials

60

61 **Non-standard Abbreviations and Acronyms**

|    |          |                                                    |
|----|----------|----------------------------------------------------|
| 62 | APOB     | apolipoprotein B                                   |
| 63 | BMI      | body mass index                                    |
| 64 | Bpm      | beats per minutes                                  |
| 65 | CHD      | coronary heart disease                             |
| 66 | CI       | confidence interval                                |
| 67 | COVID-19 | coronavirus disease 19                             |
| 68 | CVD      | cardiovascular disease                             |
| 69 | FH       | familial hypercholesterolemia                      |
| 70 | LDL      | low-density lipoprotein                            |
| 71 | LDL-C    | low-density lipoprotein cholesterol                |
| 72 | LDLR     | low-density lipoprotein receptor                   |
| 73 | LDLRAP1  | low-density lipoprotein receptor adaptor protein 1 |
| 74 | PCSK9    | proprotein convertase subtilisin/kexin type 9      |
| 75 | PSQ-18   | Patient Satisfaction Questionnaire Short Form      |

## 76 **Introduction**

77           Familial hypercholesterolemia (FH) is an autosomal dominant Mendelian disease, one  
78 of the leading causes of premature coronary heart disease (CHD) along with life-long exposure  
79 to high low-density lipoprotein (LDL) cholesterolemia.<sup>1-6</sup> The prevalence of patients with  
80 heterozygous FH is nearly 0.2-0.5% of the general population (1 in 200-500 individuals). Major  
81 FH causative genes are LDL receptor (*LDLR*), proprotein convertase subtilisin/kexin type 9  
82 (*PCSK9*), and apolipoprotein B (*APOB*) and LDLR adaptor protein 1 (*LDLRAP1*, for a  
83 particular case of autosomal recessive hypercholesterolemia). FH's clinical guidelines of FH  
84 across the world recommend that patients with FH should be treated using lipid-lowering  
85 agents at a younger age to reduce plasma LDL cholesterol (LDL-C) levels, which can prevent  
86 future episodes of CHD. Therefore, it is important to diagnose FH as early as possible.<sup>7</sup>

87           Because FH is a monogenic disorder, genetic testing is important for a definitive  
88 diagnosis.<sup>8</sup> Additionally, our previous study and other studies showed that FH-related  
89 pathogenic variants are significantly associated with a higher risk of CHD,<sup>9,10</sup> which strongly  
90 suggests that genetic testing can be used for risk stratification. However, it remains unclear  
91 whether FH-related genetic testing would have a potential to affects patients' outcomes beyond  
92 risk stratification. Recently, Kullo et al. reported that disclosure of CHD risk estimates with  
93 polygenic risk information, which consists of multiple small-effect genome-wide common  
94 genetic variations, led to lower LDL-C levels than disclosure of CHD risk based on classical  
95 risk factors alone.<sup>11</sup> Thus, does providing cardiovascular risk based on FH-related genetic  
96 testing also have an impact on changing outcomes in patients with FH?

97           Here, we examined whether informing future cardiovascular risk based on genetic  
98 testing besides conventional FH patient education leads to reduced LDL-C levels in patients  
99 with FH.

100

## 101 **Methods**

### 102 *Overall trial design*

103 This study was a randomized, wait-list controlled, open-label, single-center trial. The  
104 detailed trial protocol had been published elsewhere.<sup>8</sup> In brief, we performed genetic  
105 counseling and informed individuals about future cardiovascular risk based on patients'  
106 monogenetic testing results for the intervention group. The primary outcome was the change  
107 in plasma LDL-C levels at 24 weeks from the baseline. This trial was conducted in compliance  
108 with the Declaration of Helsinki, Ethical Guidelines for Medical and Health Research  
109 Involving Human Subjects, and all other applicable laws and guidelines in Japan. The study  
110 protocol was approved by the Institutional Review Board of Kanazawa University Hospital  
111 (Kanazawa, Japan) and registered in the Japan Registry of Clinical Trials (jRCTs042180027).

112

### 113 *Participants*

114 We recruited patients with clinically diagnosed FH from March 2018 to March 2020  
115 and followed them up until October 2021. We enrolled participants who met all the following  
116 inclusion criteria: 1) age  $\geq 15$  years; 2) clinically diagnosed with FH according to the Japan  
117 Atherosclerosis Society guidelines<sup>1,9</sup> (if two of the three following criteria were met: [i] LDL-  
118 C  $\geq 180$  mg/dL, [ii] presence of tendon xanthomas; and [iii] family history of FH or premature  
119 coronary artery disease); and 3) never had a genetic test or had not returned genetic results  
120 regarding FH. We also excluded participants who met any of the following exclusion criteria:  
121 1) liver dysfunction (aspartate aminotransferase or alanine aminotransferase  $> 3$  times the upper  
122 normal limits); 2) renal dysfunction (serum creatinine  $\geq 2.0$  mg/dL); 3) immunosuppressive  
123 state; 4) active cancer; 5) history of CHD including myocardial infarction, percutaneous  
124 coronary intervention or coronary artery bypass graft, or coronary artery stenosis ( $\geq 75\%$ )

125 previously detected by coronary angiography; or 6) females expecting to be pregnant or  
126 currently pregnant. Written informed consent was obtained from all trial participants.

127

### 128 *Screening of FH pathogenic variants*

129 We sequenced the exons of four FH-related genes (*LDLR*, *PCSK9*, *APOB*, and  
130 autosomal recessive inheritance of *LDLRAP1*) using Illumina MiSeq (San Diego, USA). We  
131 defined variants as FH causal when they matched any of the following criteria: a) registered as  
132 pathogenic/likely pathogenic in the ClinVar database; b) minor allele frequency <1% in the  
133 East Asian population with i) protein-truncating variants (nonsense, canonical splice sites, or  
134 frameshift) or ii) missense variants with five *in silico* damaging scores (SIFT, PolyPhen-2  
135 HDIV, PolyPhen-2 HVAR, MutationTaster2, LRT), all predicted as pathogenic;<sup>10</sup> c) missense  
136 variants reported as pathogenic in the Japanese population: *PCSK9* p.Val4Ile and  
137 p.Glu32Lys;<sup>11,12</sup> and d) predicted by eXome-Hidden Markov Model (XHMM) software as  
138 copy number variations (large duplication/large deletion).<sup>13</sup>

139

### 140 *Intervention and wait-list control*

141 We randomized patients to either the intervention or the wait-list control groups with  
142 FH using an independent web-based randomization system that included a minimization  
143 algorithm balanced for age ( $\geq 50$  years and  $< 50$  years), sex (male and female), and causative  
144 variant (positive or negative).

145 In the intervention group, we performed genetic counseling and informed the patients'  
146 future cardiovascular risk based on the results of their FH-related genetic testing in addition to  
147 standard FH patient education. The genetic counseling provided by a qualified physician in  
148 clinical genetics consisted of the following components: a) genetic diagnosis; b) outline of FH;  
149 c) examining the family history of hyperlipidemia/cardiovascular diseases; d) informing that

150 the results of genetic testing could facilitate research in this field; and e) explaining the  
151 physical/mental support system in the hospital. In addition, primary cardiologists provided  
152 odds ratios of future cardiovascular risk based on the presence or absence of 1) a causal genetic  
153 variant and 2) a clinical sign (xanthomas and/or family history of FH) using the original  
154 Japanese documents.<sup>8,10,14</sup> After counseling, we set sufficient time to answer the questions from  
155 the patients, confirming their level of understanding.

156 In the wait-list control group, we only disseminated standard FH patient education using  
157 the Japanese booklet for FH patient education according to the FH management guideline.<sup>1</sup>  
158 After the education session, we set the time to answer the queries from the patients. After  
159 evaluating the primary endpoint (24<sup>th</sup> week after randomization), the wait-list control group  
160 also received their genetic testing results and future cardiovascular risks via counseling.

161 In both groups, primary cardiologists provided the standard FH education for their  
162 patients. Also, primary cardiologists managed LDL cholesterol levels of their patients at their  
163 own discretion according to the Japanese guideline for FH 2017 (targeting LDL cholesterol  
164 level of <100 mg/dL or >50% reduction compared with an untreated level for primary  
165 prevention).<sup>9</sup> When adding any of lipid-lowering agents as statins, ezetimibe, or PCSK9  
166 inhibitors, the patients and the physicians must agree with each other for the treatments that  
167 were essential to achieve the target value of LDL cholesterol level. Moreover, the number of  
168 additional treatments were compared between the intervention and the wait-list control groups.  
169 Although in-person FH education was not provided outside of the scheduled outpatient clinic  
170 visits, patients in both groups could receive additional counseling and/or outpatient visit when  
171 patients wanted or were afraid of genetic testing regardless of the allocated groups during and  
172 after the trial.

173

174 *Outcomes*

175           The primary outcome was the change in plasma LDL-C levels from baseline (week 0)  
176 to week 24. Key secondary outcomes were as follows: 1) changes in plasma LDL-C levels  
177 from baseline at week 48 and 2) the Patient Satisfaction Questionnaire Short Form (PSQ-18)  
178 scales at weeks 24 and 48. We assessed these outcomes between the intervention and the wait-  
179 list control groups or among the four groups categorized by genetic testing results (FH-related  
180 causal variant, positive or negative) ([1] intervention + positive; [2] intervention + negative;  
181 [3] wait-list control + positive; and [4] wait-list control + negative).

182           The PSQ-18 scale evaluates patients' inner satisfaction level for the medical care they  
183 received from seven aspects.<sup>15</sup> We used this scale because providing future cardiovascular risk  
184 based on genetic testing could create stress for the patients in terms of longer consultation time,  
185 higher medical costs, and more drug prescriptions to achieve the target cholesterol level,  
186 particularly for the intervention group. The scale values from 1 to 5 represent the lowest to  
187 highest rating for each aspect.

188

189 *Statistical analysis and early termination due to the coronavirus disease 19 (COVID-19)*  
190 *pandemic*

191           We hypothesized that the estimated difference from baseline to week 24 in LDL-C  
192 levels between the intervention and the wait-list control groups would be 15 mg/dL, with a  
193 standard deviation of 25. In the sample size calculation, 44 patients per group were required,  
194 with a two-sided  $\alpha$  of 5% and power of 80%. We then set the drop-out rate to 10% and  
195 determined that approximately 100 patients with FH were required as initially planned.<sup>8</sup>  
196 However, we had to stop the trial enrollment in April 2020 due to the COVID-19 pandemic,  
197 with a state of emergency in Japan during the enrollment period. The principal investigator and  
198 sub-investigators all agreed to the decision, and we closed the trial in November 2021 after all



199 patients who agreed to enroll in the trial completed the protocol schedule before trial  
200 termination.

201 We compared the outcomes between the intervention and the wait-list control groups.  
202 The baseline profiles were described by mean and standard deviation, median and quantiles  
203 (continuous variables), or proportion (categorical variables). In addition, we assessed the  
204 primary outcome based on the intention-to-treat approach, which was compared between  
205 groups using the *t*-test. Moreover, we compared the secondary endpoints between the groups  
206 at each defined period using the *t*-test, Mann-Whitney *U*-test, Fisher's exact test, or linear or  
207 logistic regression adjusted for appropriate covariates. A *p*-value < 0.05 was considered  
208 statistically significant for the primary outcome. Statistical analyses were performed using R  
209 software version 4.1.2 or above (The R Project for Statistical Computing, Vienna, Austria).

210

## 211 **Results**

212 **Figure 1** shows the flowchart of the trial. We recruited 53 clinically diagnosed FH  
213 patients without a history of cardiovascular disease from March 2018 to March 2020 and  
214 followed them up until October 2021. Of these, three patients were excluded from the trial  
215 because of inappropriate eligibility (n=2) and randomization violation (n=1). The remaining  
216 50 eligible patients were randomly allocated to the intervention group (n=24) or the wait-list  
217 control group (n=26). In the intention-to-treat principle, we included all 50 patients for further  
218 analyses. The mean age of the patients was  $52 \pm 16$  years, 58% were female, 22% had  
219 hypertension, and 8% had diabetes mellitus. Regarding FH-related profiles, 76% had Achilles  
220 tendon xanthomas, 60% reported a family history of FH, and the mean plasma LDL-C level  
221 was  $127 \pm 25$  mg/dL. The number of FH-related causative genetic variant positive patients was  
222 34 (68%): 31 patients had causal variants at *LDLR* gene, 1 had causal variant (p.Glu32Lys) at  
223 *PCSK9* gene, and 2 had copy number variations at *LDLR* gene. We did not detect any causal

224 variants at *APOB* or *LDLRAP1*. The baseline characteristics were well balanced between the  
225 intervention and the wait-list control groups (**Table 1**). Since one patient in the wait-list control  
226 group refused to follow scheduled visits and laboratory tests after randomization, the study  
227 investigators excluded the patient from the study and following outcome analyses.

228

### 229 *Primary outcome*

230 At week 24, the intervention group had a significantly greater reduction in plasma LDL-  
231 C levels than the wait-list control group (mean changes from baseline, -13.1 mg/dL vs. 6.6  
232 mg/dL; between-group difference, -19.7 mg/dL; 95% confidence interval [CI], -34 to -5.6;  
233  $p=0.009$ ) (**Table 2, Figure 2**). Even when adjusted by the baseline LDL-C levels, the result  
234 was consistent (adjusted difference, -18.0 mg/dL; 95% CI, -32 to -3.8;  $p=0.02$ ).

235

### 236 *Secondary outcomes*

237 After the wait-list control group also received genetic testing-based future  
238 cardiovascular risk assessment at week 24, the LDL-C level in the wait-list control group was  
239 certainly decreased (the within-group change from week 24 to 48 was -8.0 mg/dL). In contrast,  
240 the within-group change in the intervention group from week 24 to 48 was increased by 4.3  
241 mg/dL, that lead to diminish the effect of LDL-C reduction in the intervention group at week  
242 48 from baseline. As a result, the difference between the two groups (between-group  
243 difference) from baseline to week 48 was attenuated (0.7 vs. -2.0; between-group difference,  
244 2.8; 95% CI, -26 to 31;  $p=0.85$ ) (**Table 2**).

245 **Figure 3** shows the LDL-C changes according to FH-related causative variant carrier  
246 status. Among variant carriers, the intervention group also had a greater plasma LDL-C level  
247 reduction than the wait-list control group at week 24 (-19.8 mg/dL vs. 2.9 mg/dL; between-  
248 group difference, -22.7 mg/dL; 95% CI, -40 to -5.5;  $p=0.02$ ). However, we could not detect

249 any significant differences between the groups for non-carriers at week 24 (2.3 mg/dL vs. 12.4  
250 mg/dL; between-group difference, -10.1 mg/dL; 95% CI, -33 to 12; p=0.39).

251 Since the physicians managed LDL cholesterol levels of their patients at their own  
252 discretion according to the guideline, we investigated additional treatment regimens on top of  
253 the baseline lipid-lowering agents in both groups (**Table 3**). The numbers of participants  
254 receiving add-on treatment during the study were 10 (42%) in the intervention group and 6  
255 (23%) in the wait-list control group (chi-square test, p=0.26). Of note, 90% (9/10) in the  
256 intervention group and 67% (4/6) in the wait-list control group of add-on lipid-lowering agents  
257 were prescribed within 24 weeks from receiving genetic counseling and future cardiovascular  
258 risk based on the genetic test. Moreover, the add-on treatments were conducted more frequent  
259 in causative variant carrier group (14/16, 88%) than in non-carrier group (2/16, 12%).

260

#### 261 *Patient satisfaction evaluation*

262 We further assessed the FH patients' satisfaction for medical care they received during  
263 the study period by the PSQ-18 scale analysis (**Figure 4**). We evaluated the score changes by  
264 seven aspects (general satisfaction, technical quality, interpersonal manner, communication,  
265 financial aspects, time spent with doctor, and accessibility and convenience), and there were  
266 no between-group differences in each aspect except in the "general satisfaction" aspect for  
267 medical care. Notably, FH-related causal variant non-carriers in the intervention group were  
268 less satisfied with general medical care than the wait-list control group at 24 weeks.

269

#### 270 *Subgroup analysis*

271 **Table 4** shows the subgroup analysis results for the treatment differences in LDL-C  
272 levels at week 24. There were no significant interactions in each subgroup except that age ( $\geq 50$

273 vs. <50 years) subgroup was the only significant quantitative interaction between the  
274 intervention and the wait-list control groups.

275

## 276 **Discussion**

277 This trial was the first randomized, wait-list controlled study to assess whether  
278 disclosing the risk for future cardiovascular diseases based on genetic testing results in addition  
279 to standard FH education would lead to reduced LDL-C levels in patients with FH. For the  
280 primary endpoint, the intervention group showed a significantly greater reduction in plasma  
281 LDL-C levels than the wait-list control group at week 24. The difference between the groups  
282 was attenuated at week 48 after the wait-list control group also received future cardiovascular  
283 risk assessment based on genetic testing at week 24. On the other hand, as for patient  
284 satisfaction evaluation by the PSQ-18, no between-group differences were found except for the  
285 general satisfaction aspect of medical care. Notably, non-carriers of FH-related causal variants  
286 in the intervention group were less satisfied with general medical care than those in the wait-  
287 list control group at 24 weeks.

288 The conclusions of this study are as follows. First, providing cardiovascular risk based  
289 on genetic testing further reduced plasma LDL-C levels, in addition to standard FH care. One  
290 of the reasons for the significant reduction effect could be that patients with FH may become  
291 aware of the necessity of medication, leading to better adherence to medications and  
292 achieving lifestyle modifications by themselves. However, there was a concern that the  
293 LDL-C reduction might be derived from more intensive treatments based on the information  
294 on genetic testing-based cardiovascular risk. Previous studies reported that providing genetic  
295 testing results for primary physicians did not affect their practice because they thought  
296 plasma lipid levels were simply sufficient to select treatment options for patients with FH and  
297 felt little need for genetic testing.<sup>16,17</sup> Nevertheless, another studies demonstrated that FH

298 genetic counseling for patients with FH might convince them of the use of more intensified  
299 lipid-lowering drugs and improve medication adherence, leading to lower LDL-C levels,  
300 irrespective of their treatment status.<sup>18-20</sup> Moreover, a genetic diagnosis itself could promote  
301 the selection of more aggressive lipid-lowering drugs for primary physicians.<sup>21</sup> For example,  
302 the MI-GENES clinical trial, which demonstrated the effect of disclosure of CHD genetic risk  
303 on LDL-C levels for patients with intermediate CHD risk, indicated that the lipid-lowering  
304 effects were derived from the initiation of statin medication.<sup>22</sup> In this study, We did not  
305 observe any interactions between baseline plasma LDL-C levels and the addition of lipid-  
306 lowering agents between weeks 0 and 24 (**Figure 4**). However, although non-significant, an  
307 add-on lipid-lowering treatment was more frequent within 24 weeks from receiving genetic  
308 counseling and future cardiovascular risk based on the genetic test (**Table 3**), which might  
309 have contributed to the favorable result for LDL-C reduction in the intervention group. In  
310 addition, genetic confirmation might help patients with FH reinforce a healthier diet and  
311 exercise behaviors.<sup>23</sup> These multilateral effects could affect the LDL-C levels of FH patients  
312 without a history of cardiovascular complications.

313         Second, we observed inconsistent effects of the intervention according to the variant  
314 carrier status on LDL-C levels. For FH-related causal variant carriers, the change in LDL-C  
315 levels in the intervention group was greater than that in the wait-list control group at week 24,  
316 although this favorable change did not occur in non-carriers. As stated above, providing a  
317 “positive” genetic testing result for patients may improve adherence to lipid-lowering  
318 medication and permit access to specific treatments, such as the PCSK9 inhibitor.<sup>24</sup>  
319 Moreover, Claassen et al. showed that patients with FH who received their genetic testing  
320 results had a higher perceived efficacy of lipid-lowering medication than those without.<sup>25</sup> In  
321 contrast, when the FH causal variant was not identified, the negative genetic testing result  
322 might provide mental relief even for at-risk patients,<sup>26</sup> which could have a literal “negative”

323 effect on non-carrier patients. Additionally, it could cause reduced compliance or motivation  
324 in patients.<sup>24</sup>

325 Third, although the significant LDL-C reduction was achieved after 24 weeks from  
326 the disclosure of future cardiovascular risk based on genetic testing, the effect was attenuated  
327 after 48 weeks of the intervention. The changes in LDL-C levels from genetic counseling  
328 with providing cardiovascular risk assessment to 24 weeks were consistent in both groups (-  
329 13.1 mg/dL in the intervention group and -8.0 mg/dL in the wait-list control group), whereas  
330 the change in LDL-C to 48 weeks was just +0.7 mg/dL despite performing some additional  
331 lipid-lowering treatments on the baseline regimen. Although a long-term health behavior  
332 change was certainly challenging,<sup>27,28</sup> our results implicated that the effect of our “one-time”  
333 intervention in an outpatient clinic at week 0 might be effective through 6 months but could  
334 be attenuated from then on.

335 Fourth, genetic counseling for FH did not make patients nervous overall, although non-  
336 carriers were less satisfied with general medical care than carriers. In general, patient  
337 empowerment is a potential non-clinical benefit of genetic testing. Providing a diagnosis could  
338 allow the patient to improve their understanding of the disease's clinical course, treatment  
339 options, and psychological control.<sup>26,29</sup> Genetic testing sometimes ameliorates uncertainty,  
340 stigma, and personal guilt.<sup>30,31</sup> However, it could be valid only in FH patients with positive  
341 genetic testing, not in those with negative genetic testing. Patients sometimes undergo genetic  
342 testing because they want to confirm whether they are negative. Clinically diagnosed patients  
343 with FH are at a higher risk for cardiovascular disease than patients without FH, regardless of  
344 the causative variant carrier status. However, when we provide variant-negative patients with  
345 less CHD risk than variant-positive FH patients, they might misunderstand the information,  
346 become unexpectedly reassured, and decrease their adherence and lifestyle modification. Care  
347 might be taken with these “non-carriers” to provide the current FH education strategy with

348 future cardiovascular risk assessment based on the variant-negative genetic testing results. This  
349 is because the counseling provided in this study might potentially provide misinterpretation  
350 and less satisfaction for medical care to “non-carriers”. Therefore, alternative counseling  
351 strategies may be needed for patients with variant-negative FH.

352         The strength of this study was that it was a randomized trial to demonstrate the efficacy  
353 of disclosing future cardiovascular disease risk assessment based on genetic testing results in  
354 addition to standard FH education for FH patients without a history of cardiovascular disease.  
355 The most important limitation of this study was that while we originally planned to enroll  
356 approximately 100 FH patients in this study,<sup>8</sup> we halted enrollment due to the COVID-19  
357 pandemic and closed recruitment before completing the pre-specified protocol schedule.  
358 Although the effect difference on LDL-C was larger than expected and we demonstrated the  
359 efficacy of the intervention on LDL-C levels, this unique situation needs to be considered with  
360 caution for clinical application of our findings. In addition, in terms of LDL-C levels, the mean  
361 LDL-C levels at 48 weeks were still >100 mg/dL in both groups, which was above the  
362 recommended lipid control threshold (<100 mg/dL) for FH patients as primary prevention.  
363 Although clarifying cardiovascular risk for both FH patients and primary physicians could  
364 improve the treatment quality,<sup>32</sup> achieving the target LDL-C level (<100 mg/dL) has still been  
365 a challenging goal, as the CASCADE-FH registry reported.<sup>33</sup> Although this study’s median  
366 LDL-C level was lower than that from the registry, we need to focus on the target cholesterol  
367 level to reduce the future cardiovascular risk for patients with FH as much as possible.  
368 Furthermore, we could not assessed patients’ medication adherence except patient-reported  
369 drug non-compliance that might affect the results.

370         In conclusion, in addition to standard FH care, providing cardiovascular risk assessment  
371 based on genetic testing further reduced plasma LDL-C levels further, particularly among

372 patients with FH causal variants carriers. Meanwhile, we might be careful with the non-carriers  
373 to provide this risk disclosure strategy based on the variant-negative genetic testing results.

374

### 375 **Acknowledgements**

376 We are very thankful to all the participants and staff regarding this trial. We also express  
377 our gratitude to Mitsuyo Kusajima, Emi Tamukai, Ryogo Shimizu, Asako Kanadu, and Rika  
378 Miyashita as clinical research coordinators; Kenichi Yoshimura, Hideki Ishikawa for  
379 randomization and statistical assistance; Yasuhiko Imai, and Jia Yu for clinical data  
380 management; and Toshinori Murayama, chairman of the Innovative Clinical Research Center,  
381 Kanazawa University for supporting our clinical trial.

382

### 383 **Funding**

384 This trial was supported by a Clinical Research Grant from Kanazawa University  
385 Hospital, JSPS KAKENHI (18K08064, 19K08553, 20H03927), the Astellas Foundation for  
386 Research on Metabolic Disorders, the ONO Medical Research Foundation, the Ministry of  
387 Health, Labour and Welfare of Japan (Research Grant for Rare and Intractable Diseases), and  
388 the Japanese Circulation Society (Project for Genome Analysis in Cardiovascular Diseases).

389

### 390 **Conflict of interest**

391 The authors have no conflict of interest to disclose.

392

### 393 **Data availability statement**

394 The data in this trial are available from the corresponding author upon reasonable  
395 request.



## 396 **References**

- 397 1. Harada-Shiba M, Arai H, Oikawa S, *et al.* Guidelines for the management of familial  
398 hypercholesterolemia. *J Atheroscler Thromb* 2012;**19**:1043-1060. doi:
- 399 2. Gidding SS, Champagne MA, de Ferranti SD, *et al.* The Agenda for Familial  
400 Hypercholesterolemia: A Scientific Statement From the American Heart Association.  
401 *Circulation* 2015;**132**:2167-2192. doi: 10.1161/CIR.0000000000000297
- 402 3. Watts GF, Gidding S, Wierzbicki AS, *et al.* Integrated guidance on the care of  
403 familial hypercholesterolaemia from the International FH Foundation. *Int J Cardiol*  
404 2014;**171**:309-325. doi: 10.1016/j.ijcard.2013.11.025
- 405 4. Nordestgaard BG, Chapman MJ, Humphries SE, *et al.* Familial  
406 hypercholesterolaemia is underdiagnosed and undertreated in the general population:  
407 guidance for clinicians to prevent coronary heart disease: consensus statement of the  
408 European Atherosclerosis Society. *Eur Heart J* 2013;**34**:3478-3490a. doi:  
409 10.1093/eurheartj/eh273
- 410 5. Mabuchi H, Nohara A, Noguchi T, *et al.* Molecular genetic epidemiology of  
411 homozygous familial hypercholesterolemia in the Hokuriku district of Japan. *Atherosclerosis*  
412 2011;**214**:404-407. doi: 10.1016/j.atherosclerosis.2010.11.005
- 413 6. Versmissen J, Oosterveer DM, Yazdanpanah M, *et al.* Efficacy of statins in familial  
414 hypercholesterolaemia: a long term cohort study. *BMJ* 2008;**337**:a2423. doi:  
415 10.1136/bmj.a2423
- 416 7. Teramoto T, Kobayashi M, Tasaki H, *et al.* Efficacy and Safety of Alirocumab in  
417 Japanese Patients With Heterozygous Familial Hypercholesterolemia or at High  
418 Cardiovascular Risk With Hypercholesterolemia Not Adequately Controlled With Statins-  
419 ODYSSEY JAPAN Randomized Controlled Trial. *Circ J* 2016;**80**:1980-1987. doi:  
420 10.1253/circj.CJ-16-0387
- 421 8. Nomura A, Tada H, Okada H, *et al.* Impact of genetic testing on low-density  
422 lipoprotein cholesterol in patients with familial hypercholesterolemia (GenTLe-FH): a  
423 randomised waiting list controlled open-label study protocol. *BMJ Open* 2018;**8**:e023636.  
424 doi: 10.1136/bmjopen-2018-023636
- 425 9. Harada-Shiba M, Arai H, Ishigaki Y, *et al.* Guidelines for Diagnosis and Treatment of  
426 Familial Hypercholesterolemia 2017. *J Atheroscler Thromb* 2018;**25**:751-770. doi:  
427 10.5551/jat.CR003

- 428 10. Khera AV, Won HH, Peloso GM, *et al.* Diagnostic Yield and Clinical Utility of  
429 Sequencing Familial Hypercholesterolemia Genes in Patients With Severe  
430 Hypercholesterolemia. *J Am Coll Cardiol* 2016;**67**:2578-2589. doi:  
431 10.1016/j.jacc.2016.03.520
- 432 11. Mabuchi H, Nohara A, Noguchi T, *et al.* Genotypic and phenotypic features in  
433 homozygous familial hypercholesterolemia caused by proprotein convertase subtilisin/kexin  
434 type 9 (PCSK9) gain-of-function mutation. *Atherosclerosis* 2014;**236**:54-61. doi:  
435 10.1016/j.atherosclerosis.2014.06.005
- 436 12. Ohta N, Hori M, Takahashi A, *et al.* Proprotein convertase subtilisin/kexin 9 V4I  
437 variant with LDLR mutations modifies the phenotype of familial hypercholesterolemia. *J*  
438 *Clin Lipidol* 2016;**10**:547-555 e545. doi: 10.1016/j.jacl.2015.12.024
- 439 13. Fromer M, Moran JL, Chambert K, *et al.* Discovery and statistical genotyping of  
440 copy-number variation from whole-exome sequencing depth. *Am J Hum Genet* 2012;**91**:597-  
441 607. doi: 10.1016/j.ajhg.2012.08.005
- 442 14. Tada H, Kawashiri MA, Nohara A, *et al.* Impact of clinical signs and genetic  
443 diagnosis of familial hypercholesterolaemia on the prevalence of coronary artery disease in  
444 patients with severe hypercholesterolaemia. *Eur Heart J* 2017. doi: 10.1093/eurheartj/ehx004
- 445 15. Marshall G, Hays R. The Patient Satisfaction Questionnaire  
446 Short Form (PSQ-18). Santa Monica, CA: RAND Corporation; 1994. p7865.
- 447 16. Will CM, Armstrong D, Marteau TM. Genetic unexceptionalism: clinician accounts  
448 of genetic testing for familial hypercholesterolaemia. *Soc Sci Med* 2010;**71**:910-917. doi:  
449 10.1016/j.socscimed.2010.05.018
- 450 17. Lerner B, Marshall N, Oishi S, *et al.* The value of genetic testing: beyond clinical  
451 utility. *Genet Med* 2017;**19**:763-771. doi: 10.1038/gim.2016.186
- 452 18. Umans-Eckenhausen MA, Defesche JC, Sijbrands EJ, Scheerder RL, Kastelein JJ.  
453 Review of first 5 years of screening for familial hypercholesterolaemia in the Netherlands.  
454 *Lancet* 2001;**357**:165-168. doi: 10.1016/S0140-6736(00)03587-X
- 455 19. Leren TP. Cascade genetic screening for familial hypercholesterolemia. *Clin Genet*  
456 2004;**66**:483-487. doi: 10.1111/j.1399-0004.2004.00320.x
- 457 20. Sturm AC, Knowles JW, Gidding SS, *et al.* Clinical Genetic Testing for Familial  
458 Hypercholesterolemia: JACC Scientific Expert Panel. *J Am Coll Cardiol* 2018;**72**:662-680.  
459 doi: 10.1016/j.jacc.2018.05.044

- 460 21. Paynter NP, Ridker PM, Chasman DI. Are Genetic Tests for Atherosclerosis Ready  
461 for Routine Clinical Use? *Circ Res* 2016;**118**:607-619. doi:  
462 10.1161/CIRCRESAHA.115.306360
- 463 22. Kullo IJ, Jouni H, Austin EE, *et al.* Incorporating a Genetic Risk Score Into Coronary  
464 Heart Disease Risk Estimates: Effect on Low-Density Lipoprotein Cholesterol Levels (the  
465 MI-GENES Clinical Trial). *Circulation* 2016;**133**:1181-1188. doi:  
466 10.1161/CIRCULATIONAHA.115.020109
- 467 23. Hagger MS, Hardcastle SJ, Hingley C, *et al.* Predicting Self-Management Behaviors  
468 in Familial Hypercholesterolemia Using an Integrated Theoretical Model: the Impact of  
469 Beliefs About Illnesses and Beliefs About Behaviors. *Int J Behav Med* 2016;**23**:282-294. doi:  
470 10.1007/s12529-015-9531-x
- 471 24. Brown EE, Sturm AC, Cuchel M, *et al.* Genetic testing in dyslipidemia: A scientific  
472 statement from the National Lipid Association. *J Clin Lipidol* 2020;**14**:398-413. doi:  
473 10.1016/j.jacl.2020.04.011
- 474 25. Claassen L, Henneman L, van der Weijden T, Marteau TM, Timmermans DR. Being  
475 at risk for cardiovascular disease: perceptions and preventive behavior in people with and  
476 without a known genetic predisposition. *Psychol Health Med* 2012;**17**:511-521. doi:  
477 10.1080/13548506.2011.644246
- 478 26. Severin F, Borry P, Cornel MC, *et al.* Points to consider for prioritizing clinical  
479 genetic testing services: a European consensus process oriented at accountability for  
480 reasonableness. *Eur J Hum Genet* 2015;**23**:729-735. doi: 10.1038/ejhg.2014.190
- 481 27. Middleton KR, Anton SD, Perri MG. Long-Term Adherence to Health Behavior  
482 Change. *Am J Lifestyle Med* 2013;**7**:395-404. doi: 10.1177/1559827613488867
- 483 28. Bouton ME. Why behavior change is difficult to sustain. *Prev Med* 2014;**68**:29-36.  
484 doi: 10.1016/j.ypmed.2014.06.010
- 485 29. Berberich AJ, Hegele RA. The role of genetic testing in dyslipidaemia. *Pathology*  
486 2019;**51**:184-192. doi: 10.1016/j.pathol.2018.10.014
- 487 30. Senior V, Smith JA, Michie S, Marteau TM. Making sense of risk: an interpretative  
488 phenomenological analysis of vulnerability to heart disease. *J Health Psychol* 2002;**7**:157-  
489 168. doi: 10.1177/1359105302007002455
- 490 31. Weiner K, Durrington PN. Patients' understandings and experiences of familial  
491 hypercholesterolemia. *Community Genet* 2008;**11**:273-282. doi: 10.1159/000121398

- 492 32. Jones LK, Sturm AC, Seaton TL, *et al.* Barriers, facilitators, and solutions to familial  
493 hypercholesterolemia treatment. *PLoS One* 2020;**15**:e0244193. doi:  
494 10.1371/journal.pone.0244193
- 495 33. deGoma EM, Ahmad ZS, O'Brien EC, *et al.* Treatment Gaps in Adults With  
496 Heterozygous Familial Hypercholesterolemia in the United States: Data From the  
497 CASCADE-FH Registry. *Circ Cardiovasc Genet* 2016;**9**:240-249. doi:  
498 10.1161/CIRCGENETICS.116.001381  
499

500 **Figure legends.**

501 **Figure 1. Trial flowchart.**

502 We enrolled 53 patients with clinically diagnosed FH and no prior coronary artery disease. Of  
503 those, 50 eligible FH patients were randomly allocated to the intervention group (24 patients  
504 receiving conventional FH education and future cardiovascular risk assessment based on  
505 genetic testing) or the wait-list control group (26 patients receiving only conventional FH  
506 education). We followed the two groups for up to 48 weeks and performed an intention-to-  
507 treat analysis. The primary endpoint was the change in LDL-C levels from baseline at week  
508 24. Because we handled the wait-list control group as a wait-list group, we also provided  
509 future cardiovascular risk assessment based on genetic testing after evaluating the primary  
510 endpoint at week 24.

511

512 **Figure 2. Low-density lipoprotein cholesterol changes from baseline.**

513 Regarding the primary endpoint at week 24, the intervention group had a significantly greater  
514 reduction in plasma LDL-C level than the wait-list control group. After the wait-list control  
515 group also received genetic testing-based future cardiovascular risk assessment at week 24,  
516 the difference between the two groups was attenuated at week 48. \*:p<0.05. Error bars  
517 indicated the standard error.

518

519 **Figure 3. Low-density lipoprotein cholesterol changes from baseline by FH-related**  
520 **causative variant carrier status with additional treatment information.**

521 **A.** Variant carriers (n=34). **B.** Non-carriers (n=16). Treatment icons (statin or ezetimibe, statin  
522 and ezetimibe, or PCSK9 inhibitor) were placed at the time of each additional medication.  
523 Among variant carriers, the intervention group also had a greater plasma LDL-C level  
524 reduction than the wait-list control group at week 24. However, we could not detect any  
525 apparent differences between the groups for non-carriers. Error bars indicated standard errors

526

527 **Figure 4. Changes in patient satisfaction questionnaire scale scores by groups.**

528 There were no between-group differences except in the “general satisfaction” aspect of medical  
529 care. According to the general satisfaction scale results, variant non-carriers in the intervention  
530 group were less satisfied with general medical care than the wait-list control group at 24 weeks.  
531 \*:p<0.05. Error bars indicated the standard error.

532 **Table 1.** Baseline characteristics.

|                                                 | <b>Total</b> | <b>Intervention</b> | <b>Wait-list control</b> |
|-------------------------------------------------|--------------|---------------------|--------------------------|
| <b>N</b>                                        | 50           | 24                  | 26                       |
| <b>Age, years</b>                               | 52 ± 16      | 54 ± 15             | 50 ± 17                  |
| <b>Female, n (%)</b>                            | 29 (58)      | 13 (54)             | 16 (62)                  |
| <b>Body weight, kg</b>                          | 64.0 [55-69] | 64.0 [55-68]        | 64.1 [55-71]             |
| <b>BMI, kg/m<sup>2</sup></b>                    | 23.4 [22-27] | 23.7 [21-28]        | 23.0 [22-26]             |
| <b>Systolic blood pressure, mmHg</b>            | 116 ± 16     | 116 ± 14            | 117 ± 17                 |
| <b>Diastolic blood pressure, mmHg</b>           | 70 ± 10      | 70 ± 10             | 70 ± 11                  |
| <b>Heart rate, bpm</b>                          | 67 ± 11      | 66 ± 13             | 69 ± 9                   |
| <b>Comorbidities, n (%)</b>                     |              |                     |                          |
| Hypertension                                    | 11 (22)      | 6 (25)              | 5 (19)                   |
| Diabetes mellitus                               | 4 (8)        | 1 (4)               | 3 (12)                   |
| Current smoking                                 | 5 (10)       | 2 (8)               | 3 (12)                   |
| <b>FH-related profile, n (%)</b>                |              |                     |                          |
| Achilles tendon xanthomas                       | 38 (76)      | 19 (79)             | 19 (73)                  |
| Family history of FH                            | 30 (60)      | 12 (50)             | 18 (69)                  |
| <b>Lipid-lowering agents at baseline, n (%)</b> |              |                     |                          |
| Statins                                         | 48 (96)      | 23 (96)             | 25 (96)                  |
| Ezetimibe                                       | 34 (68)      | 17 (71)             | 17 (65)                  |
| PCSK9 inhibitors                                | 1 (2)        | 0                   | 1 (4)                    |
| <b>Genetic variants, n (%)</b>                  |              |                     |                          |
| Positive                                        | 34 (68)      | 17 (71)             | 17 (65)                  |
| At <i>LDLR</i> gene                             | 31           | 15                  | 16                       |
| At <i>PCSK9</i> gene                            | 1            | 1                   | 0                        |
| At <i>APOB</i> gene                             | 0            | 0                   | 0                        |
| At <i>LDLRAP1</i> gene (AR inheritance)         | 0            | 0                   | 0                        |
| Copy number variations (at <i>LDLR</i> gene)    | 2            | 1                   | 1                        |
| Negative                                        | 16 (32)      | 7 (29)              | 9 (35)                   |
| <b>Lipid profiles</b>                           |              |                     |                          |
| Total cholesterol, mg/dL                        | 205 ± 31     | 209 ± 33            | 200 ± 29                 |
| Triglycerides, mg/dL                            | 100 ± 65     | 112 ± 74            | 90 ± 55                  |
| High-density lipoprotein cholesterol, mg/dL     | 59 ± 13      | 57 ± 12             | 60 ± 14                  |
| Low-density lipoprotein cholesterol, mg/dL      | 127 ± 25     | 133 ± 28            | 121 ± 21                 |
| <b>PSQ-18 scale aspect</b>                      |              |                     |                          |
| General satisfaction                            | 3.98 ± 0.62  | 3.96 ± 0.67         | 4.00 ± 0.58              |
| Technical quality                               | 3.99 ± 0.52  | 3.89 ± 0.59         | 4.09 ± 0.45              |
| Interpersonal manner                            | 4.09 ± 0.57  | 4.08 ± 0.62         | 4.10 ± 0.53              |
| Communication                                   | 4.34 ± 0.41  | 4.38 ± 0.45         | 4.31 ± 0.38              |
| Financial aspects                               | 3.30 ± 0.68  | 3.21 ± 0.85         | 3.39 ± 0.48              |
| Time spent with a doctor                        | 3.74 ± 0.61  | 3.85 ± 0.65         | 3.64 ± 0.56              |
| Accessibility and convenience                   | 3.71 ± 0.49  | 3.73 ± 0.49         | 3.68 ± 0.49              |

533 Continuous values were expressed as mean  $\pm$  standard deviation or median (interquartile range).  
534 Abbreviations: AR, autosomal recessive; BMI, body mass index; bpm, beats per minutes; FH,  
535 familial hypercholesterolemia; LDLR, low-density lipoprotein receptor; PCSK9, proprotein  
536 convertase subtilisin/kexin type 9; PSQ-18, Patient Satisfaction Questionnaire Short Form.  
537

538 **Table 2. Within-group changes and between-group differences of LDL cholesterol**  
539 **levels.**

|                                      | <b>week 0 (baseline)</b><br><b>vs.</b><br><b>week 24</b> | <b>week 24</b><br><b>vs.</b><br><b>week 48</b> | <b>week 0 (baseline)</b><br><b>vs.</b><br><b>week 48</b> |
|--------------------------------------|----------------------------------------------------------|------------------------------------------------|----------------------------------------------------------|
| <b>1. All participants</b>           |                                                          |                                                |                                                          |
| <b>Within-group changes</b>          |                                                          |                                                |                                                          |
| Intervention group                   |                                                          |                                                |                                                          |
| LDL-C, mean change (SE)              | -13.1 (6.2)                                              | 4.3 (2.6)                                      | 0.7 (11.3)                                               |
| Wait-list control group              |                                                          |                                                |                                                          |
| LDL-C, mean change (SE)              | 6.6 (6.7)                                                | -8.0 (7.0)                                     | -2.0 (9.0)                                               |
| <b>Between-group differences*</b>    |                                                          |                                                |                                                          |
| LDL-C, mean change [95% CI]          | -19.7<br>[-33.8 to -5.6]<br>p=0.009**                    | 12.3<br>[-2.0 to 26.6]<br>p=0.10               | 2.7<br>[-25.6 to 31.1]<br>p=0.85                         |
| <b>2. Causative variant positive</b> |                                                          |                                                |                                                          |
| <b>Within-group changes</b>          |                                                          |                                                |                                                          |
| Intervention group                   |                                                          |                                                |                                                          |
| LDL-C, mean change (SE)              | -19.8 (6.6)                                              | 6.0 (3.0)                                      | -0.1 (15.6)                                              |
| Wait-list control group              |                                                          |                                                |                                                          |
| LDL-C, mean change (SE)              | 2.9 (5.6)                                                | -9.6 (11.5)                                    | -7.7 (13.0)                                              |
| <b>Between-group differences*</b>    |                                                          |                                                |                                                          |
| LDL-C, mean change [95% CI]          | -22.7<br>[-39.9 to -5.5]<br>p=0.02**                     | 15.5<br>[-5.7 to 36.7]<br>p=0.16               | 7.6<br>[-33.3 to 48.5]<br>p=0.72                         |
| <b>3. Causative variant negative</b> |                                                          |                                                |                                                          |
| <b>Within-group changes</b>          |                                                          |                                                |                                                          |
| Intervention group                   |                                                          |                                                |                                                          |
| LDL-C, mean change (SE)              | 2.3 (6.5)                                                | 0.5 (4.9)                                      | 2.8 (9.1)                                                |
| Wait-list control group              |                                                          |                                                |                                                          |
| LDL-C, mean change (SE)              | 12.4 (8.7)                                               | -5.7 (5.1)                                     | 6.8 (11.2)                                               |
| <b>Between-group differences*</b>    |                                                          |                                                |                                                          |
| LDL-C, mean change [95% CI]          | -10.1<br>[-32.5 to 12.3]<br>p=0.39                       | 6.2<br>[-8.0 to 20.3]<br>p=0.41                | -3.9<br>[-33.4 to 25.6]<br>p=0.80                        |

540

541 \*:P values were calculated comparing the intervention group with the wait-list control group

542 using the *t*-test. \*\*: p<0.05.

543



544 **Table 3. Add-on treatment regimens by primary physicians during study period.**

|                                         | <b>Intervention<br/>(n=24)</b> | <b>Wait-list control<br/>(n=26)</b> |
|-----------------------------------------|--------------------------------|-------------------------------------|
| <b>Total number of add-on treatment</b> | 10 (42%)                       | 6 (23%)                             |
| <b>Add-on timing</b>                    |                                |                                     |
| Week 0 to week 16                       | 9 (9/10, 90%)                  | 2 (2/6, 33%)                        |
| At week 0                               | 8                              | 2                                   |
| At week 8                               | 1                              | 0                                   |
| At week 16                              | 0                              | 0                                   |
| Week 24 to week 40                      | 1 (1/10, 10%)                  | 4 (4/6, 67%)                        |
| At week 24                              | 0                              | 3                                   |
| At week 32                              | 0                              | 1                                   |
| At week 40                              | 1                              | 0                                   |
| <b>Causative variant</b>                |                                |                                     |
| Carrier subgroup                        | 9 (9/10, 90%)                  | 5 (5/6, 83%)                        |
| Non-carrier subgroup                    | 1 (1/10, 10%)                  | 1 (1/6, 17%)                        |
| <b>Add-on treatment regimen</b>         |                                |                                     |
| Statin / ezetimibe                      | 9 (9/10, 90%)                  | 3 (3/6, 50%)                        |
| PCSK9 inhibitor                         | 1 (1/10, 10%)                  | 3 (3/6, 50%)                        |

545

546 PCSK9, proprotein convertase subtilisin/kexin type 9.

547 **Table 4.** Treatment differences in low-density lipoprotein cholesterol changes at week 24  
548 between the intervention and the wait-list control groups by patient subgroups.

|                                                      | <b>Intervention</b> | <b>Wait-list control</b> | <b>Difference (95% CI)</b> | <b>P interaction</b> |
|------------------------------------------------------|---------------------|--------------------------|----------------------------|----------------------|
| Age ≥50 (n=26)                                       | -5.2                | 1.4                      | -6.6 [-20 to 7.0]          | 0.038                |
| Age <50 (n=24)                                       | -23.3               | 13.4                     | -36.7 [-62 to -11]         |                      |
| Male (n=21)                                          | -12.2               | -0.4                     | -11.8 [-33 to 9.7]         | 0.41                 |
| Female (n=29)                                        | -13.8               | 10.4                     | -24.2 [-43 to -5.0]        |                      |
| BMI ≥25 (n=15)                                       | -19.1               | 2.3                      | -21.4 [-48 to 5.1]         | 0.88                 |
| BMI <25 (n=35)                                       | -10.4               | 8.6                      | -19.0 [-36 to -2.0]        |                      |
| Hypertension+ (n=11)                                 | -6.6                | -0.6                     | -6.0 [-28 to 16]           | 0.30                 |
| Hypertension- (n=39)                                 | -15.4               | 8.6                      | -24.0 [-41 to -6.7]        |                      |
| Xanthomas+ (n=39)                                    | -9.5                | 7.7                      | -17.2 [-33 to -1.1]        | 0.51                 |
| Xanthomas- (n=11)                                    | -25.9               | 3.0                      | -28.9 [-58 to 0.3]         |                      |
| Family history of FH+ (n=30)                         | -12.7               | 8.9                      | -21.5 [-39 to -3.6]        | 0.71                 |
| Family history of FH- (n=20)                         | -13.5               | 2.4                      | -15.9 [-40 to 8.2]         |                      |
| Causative variant positive (n=34)                    | -19.8               | 2.9                      | -22.7 [-40 to -9.6]        | 0.40                 |
| Causative variant negative (n=16)                    | 2.3                 | 12.4                     | -10.1 [-33 to 12]          |                      |
| Baseline LDL-C ≥130 (n=21)                           | -25.8               | 3.4                      | -29.2 [-54 to -4.7]        | 0.24                 |
| Baseline LDL-C <130 (n=29)                           | -3.3                | 9.1                      | -12.4 [-27 to 2.6]         |                      |
| Adding lipid-lowering agents at week 0 to 16+ (n=11) | -20.4               | 5.4                      | -25.8 [-80 to 28]          | 0.72                 |
| Adding lipid-lowering agents at week 0 to 16- (n=39) | -9.2                | 6.7                      | -15.9 [-32 to 0.1]         |                      |

549

550 Abbreviations: BMI, body mass index; CI, confidence interval; FH, familial  
551 hypercholesterolemia; LDL-C, low-density lipoprotein cholesterol.

552 **Figure 1.** Trial flowchart.

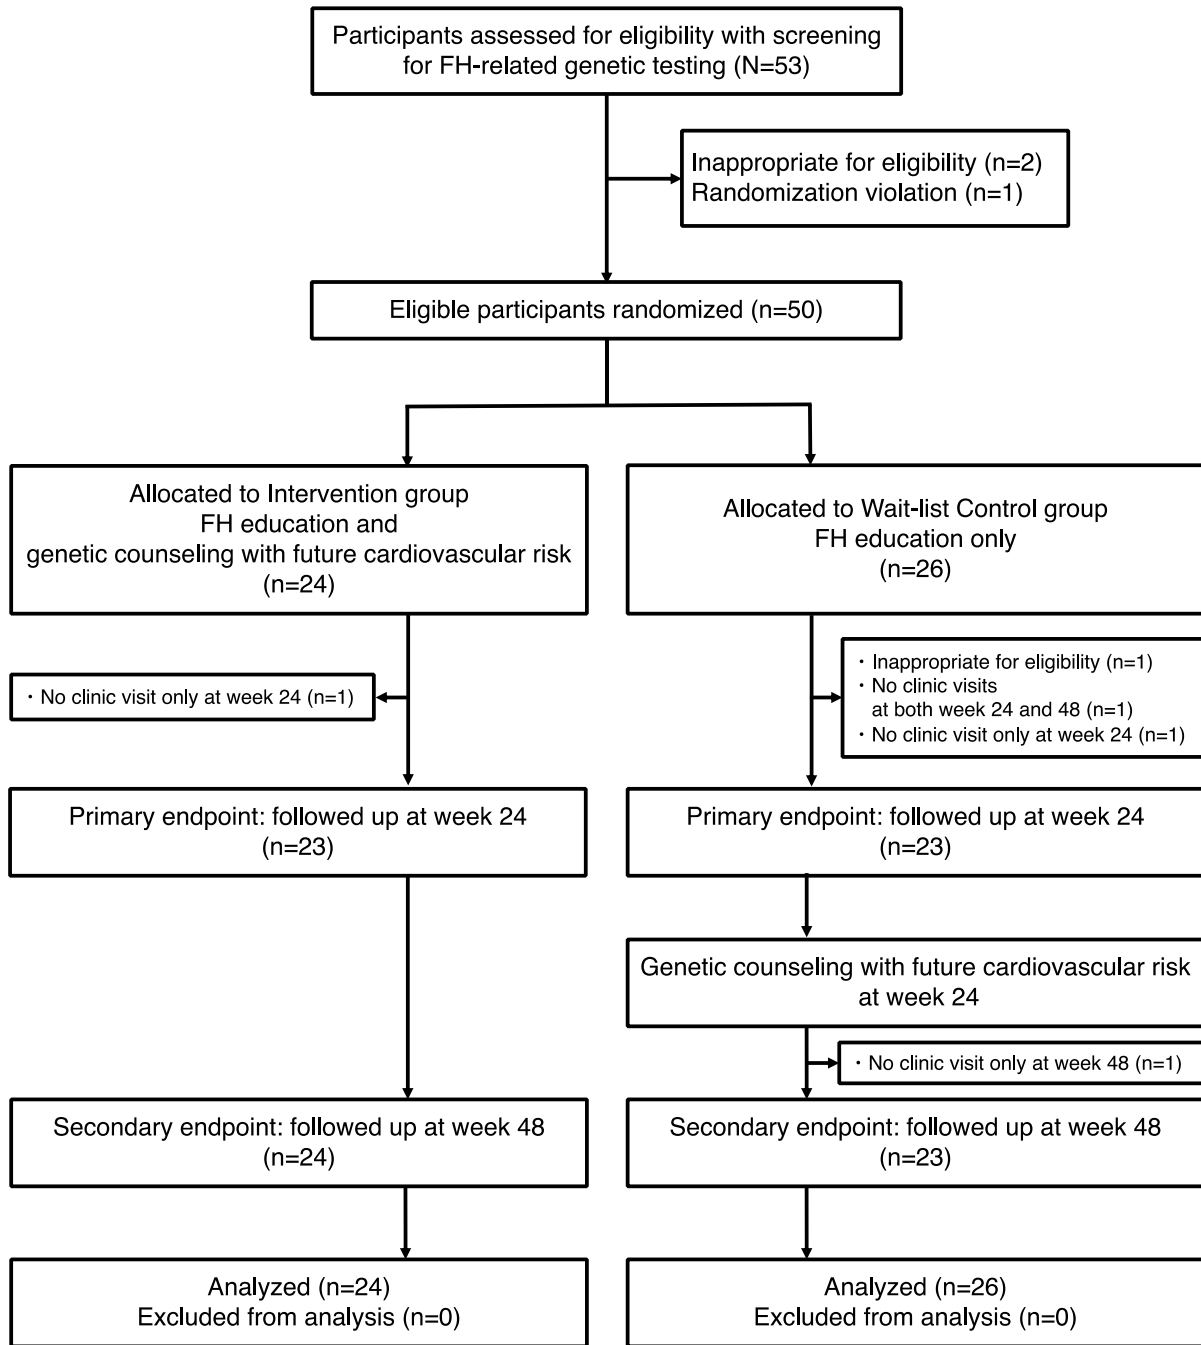

553

554

555 **Figure 2.** Low-density lipoprotein cholesterol changes from baseline.

556

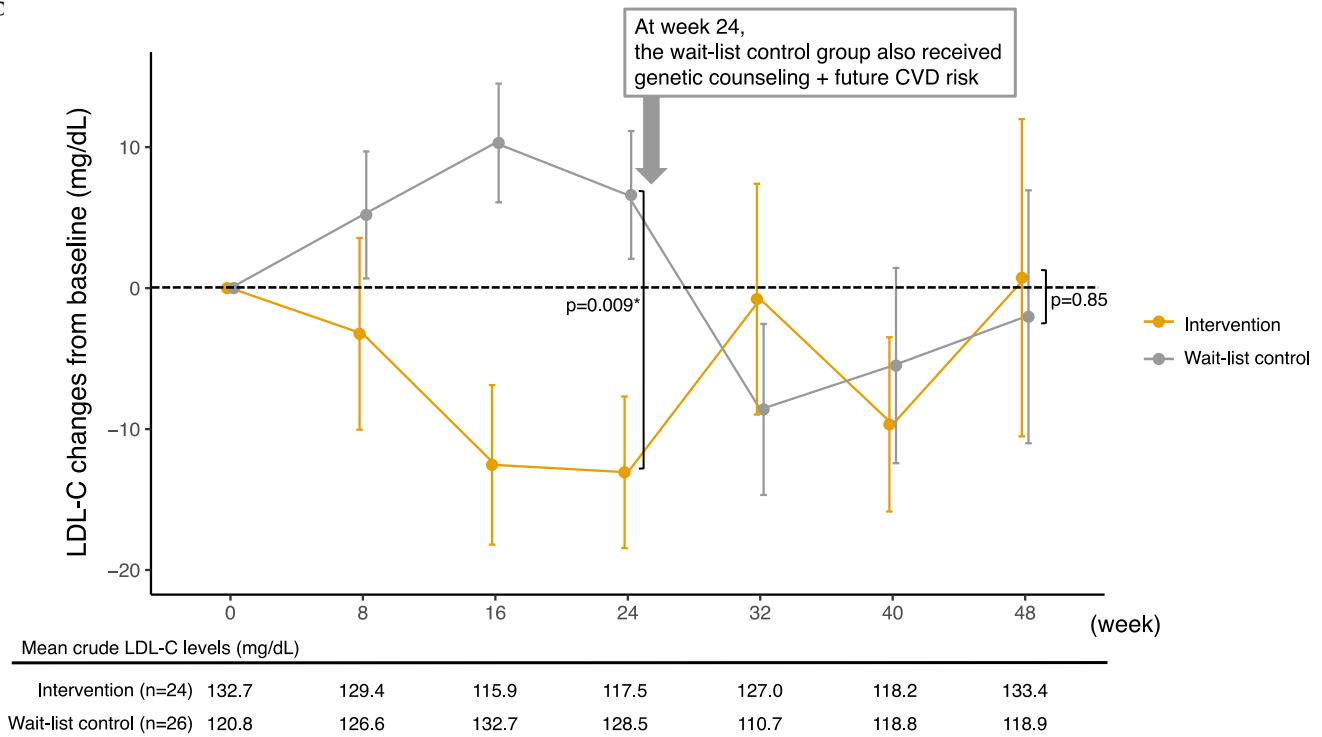

557 **Figure 3.** Low-density lipoprotein cholesterol changes from baseline by FH-related causative  
 558 variant carrier status with additional treatment information.

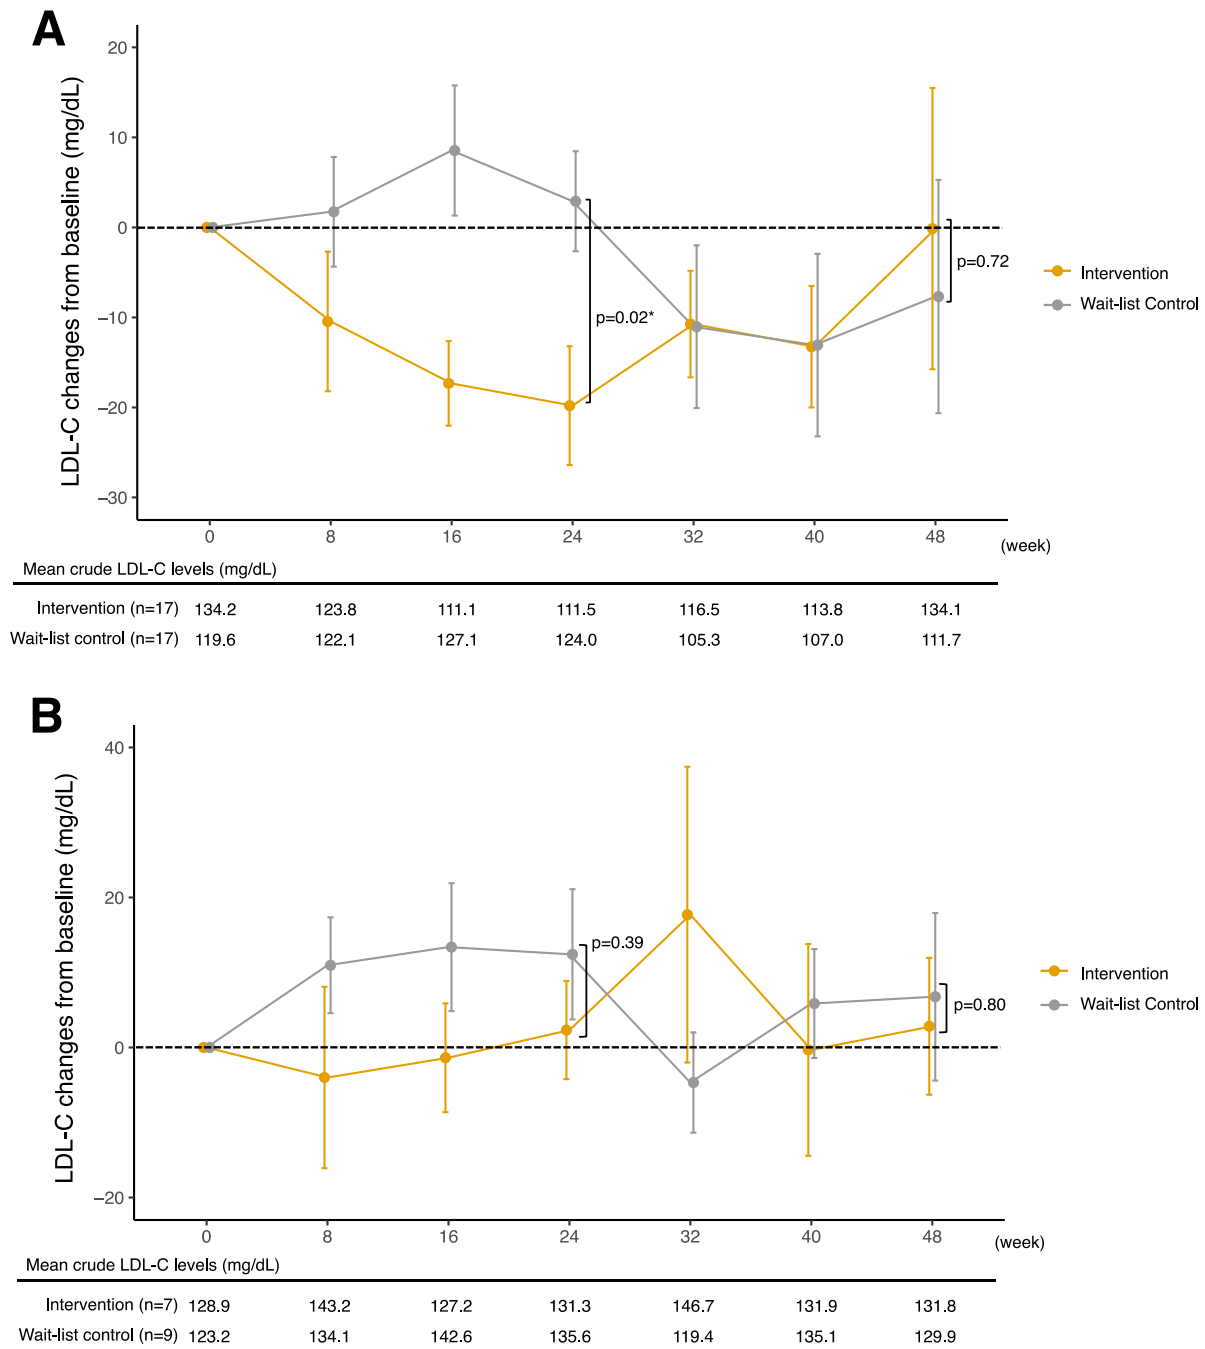

559

560 **Figure 4.** Changes in patient satisfaction questionnaire scale scores by groups.

56

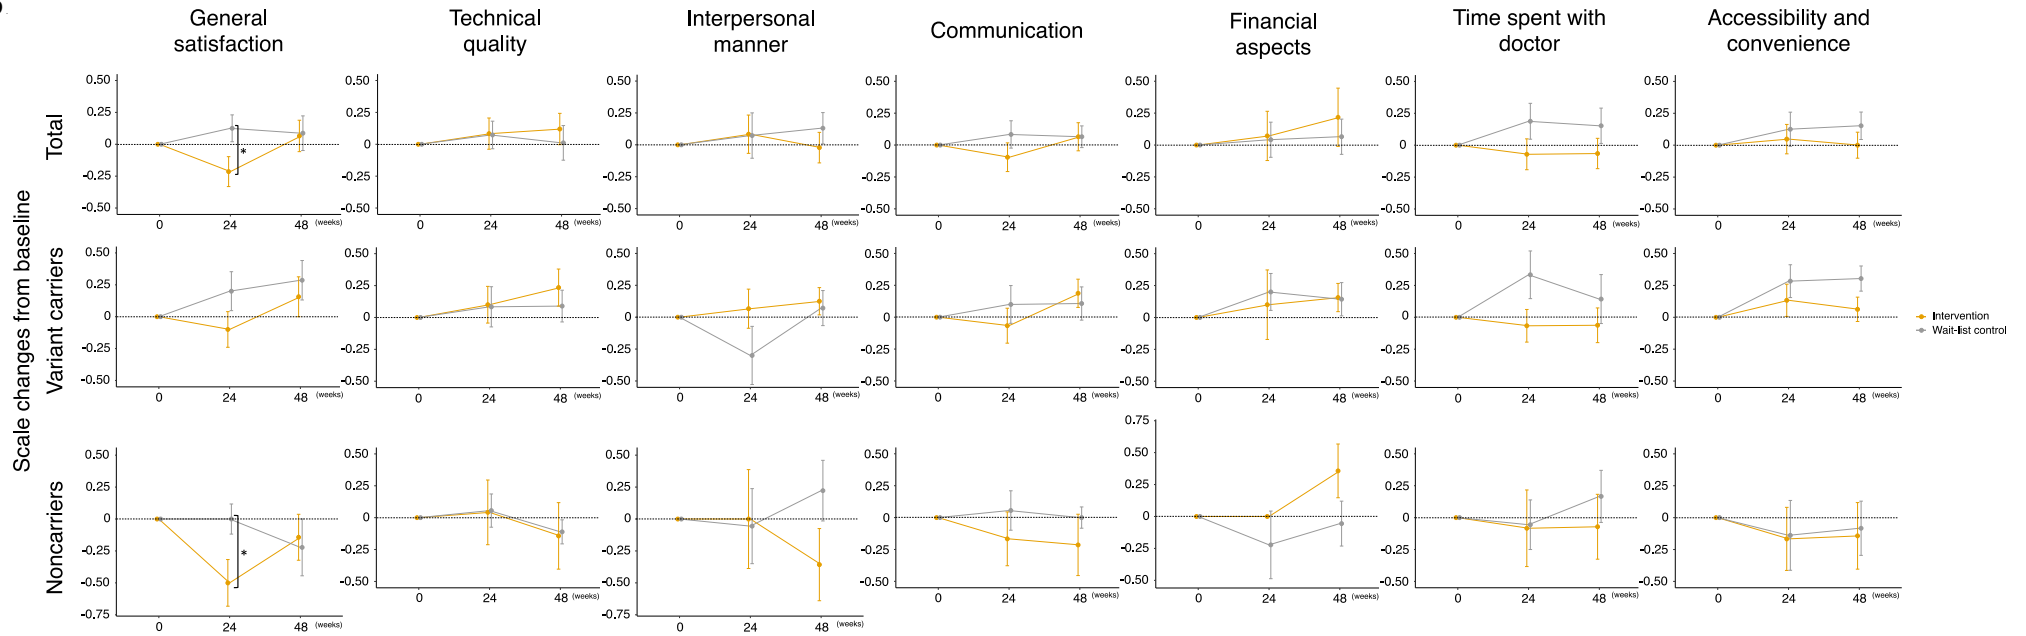

Source: https://medrxiv.org/content/10.1101/2023.03.26.23287767.full.pdf
